# Supplementary material
Source: PubMed Central journal article supplement (PMC10846798)
Supplement: CJHP-77-1-3472-s0001.pdf [file CJHP-77-1-3472-s0001.pdf]

SUPPLEMENT 1. PLURAL-ACS supplemental material.

**Part 1. Details of Pharmacist Care in the PLURAL-ACS Pilot Program**

| <b>Medication-Taking Assessment and Identification of Barriers</b>                                                                                                                                                               |                                                                                                                                                                                                                                                                                                                                                                                                                            |
|----------------------------------------------------------------------------------------------------------------------------------------------------------------------------------------------------------------------------------|----------------------------------------------------------------------------------------------------------------------------------------------------------------------------------------------------------------------------------------------------------------------------------------------------------------------------------------------------------------------------------------------------------------------------|
| <b>1. Identification and resolution of financial barriers to medication-taking (at first telephone call and then as needed)</b>                                                                                                  |                                                                                                                                                                                                                                                                                                                                                                                                                            |
| <b>Activity</b>                                                                                                                                                                                                                  | <b>Options for Resolution</b>                                                                                                                                                                                                                                                                                                                                                                                              |
| <ul style="list-style-type: none"> <li>Identifying how patient pays for medications</li> <li>Identifying patient's drug insurance</li> <li>Identifying any financial barriers to medication-taking</li> </ul>                    | <ul style="list-style-type: none"> <li>Assisting with applications for drug coverage authorizations for cardiac medications when indicated, if issues are identified (patient's outpatient cardiologist may be contacted)</li> <li>Switching therapies to lowest-cost alternative</li> <li>Using half of double-strength tablet</li> </ul>                                                                                 |
| <b>2. Identification and resolution of other barriers to medication-taking (at first telephone call and then as needed)</b>                                                                                                      |                                                                                                                                                                                                                                                                                                                                                                                                                            |
| <b>Activity</b>                                                                                                                                                                                                                  | <b>Options for Resolution</b>                                                                                                                                                                                                                                                                                                                                                                                              |
| <ul style="list-style-type: none"> <li>Identifying barriers to accessing community pharmacy</li> </ul>                                                                                                                           | <ul style="list-style-type: none"> <li>Identifying patient's pharmacy and any other nearby pharmacy to access medications</li> <li>Contacting community pharmacy for delivery of medications to patient</li> <li>Contacting a family member to pick up medications</li> </ul>                                                                                                                                              |
| <ul style="list-style-type: none"> <li>Identifying lack of medication availability in the community pharmacy</li> </ul>                                                                                                          | <ul style="list-style-type: none"> <li>Contacting community pharmacy</li> <li>Referring patient to an alternative community pharmacy that has medication in stock</li> </ul>                                                                                                                                                                                                                                               |
| <ul style="list-style-type: none"> <li>Identifying patient-related factors that delay/prevent prescription fill and/or medication-adherence (e.g., intentional or non-intentional non-adherence, performance deficit)</li> </ul> | <ul style="list-style-type: none"> <li>Providing education on indication for therapy and consequences of medication-adherence (see section 5 of "Therapeutic Review")</li> <li>Providing strategies to help with medication-taking (e.g., setting up blister packs, dosettes, alarms, medication delivery; involving family member; sending letter to PCP to apply for medication assistance through home care)</li> </ul> |

|                                                                                                                                                                                                                                                                                                                                                                                              |                                                                                                                                                                                                                                                                                                                                                                                                                                                                                                                                                  |
|----------------------------------------------------------------------------------------------------------------------------------------------------------------------------------------------------------------------------------------------------------------------------------------------------------------------------------------------------------------------------------------------|--------------------------------------------------------------------------------------------------------------------------------------------------------------------------------------------------------------------------------------------------------------------------------------------------------------------------------------------------------------------------------------------------------------------------------------------------------------------------------------------------------------------------------------------------|
|                                                                                                                                                                                                                                                                                                                                                                                              | <ul style="list-style-type: none"> <li>Intervening to solve AEs/ interactions (see section 3 of “Therapeutic Review”)</li> </ul>                                                                                                                                                                                                                                                                                                                                                                                                                 |
| <b>Therapeutic Review</b>                                                                                                                                                                                                                                                                                                                                                                    |                                                                                                                                                                                                                                                                                                                                                                                                                                                                                                                                                  |
| <b>1. Medication reconciliation (at first telephone call and then as needed)</b>                                                                                                                                                                                                                                                                                                             |                                                                                                                                                                                                                                                                                                                                                                                                                                                                                                                                                  |
| <b>Activity</b>                                                                                                                                                                                                                                                                                                                                                                              | <b>Options for Resolution</b>                                                                                                                                                                                                                                                                                                                                                                                                                                                                                                                    |
| <ul style="list-style-type: none"> <li>Best possible medication history for all medications (at first telephone call)</li> <li>Medication reconciliation performed by comparing discharge prescription and patient’s current medication list; patient’s initial hospital admission medication list is also assessed if any discrepancies are identified (at first telephone call)</li> </ul> | <ul style="list-style-type: none"> <li>Resolution of medication discrepancies that pose a risk to patient’s cardiac condition and/or immediate well-being (at each telephone call)</li> </ul>                                                                                                                                                                                                                                                                                                                                                    |
| <b>2. Identification of errors in discharge prescription (at first telephone call)</b>                                                                                                                                                                                                                                                                                                       |                                                                                                                                                                                                                                                                                                                                                                                                                                                                                                                                                  |
| <b>Activity</b>                                                                                                                                                                                                                                                                                                                                                                              | <b>Options for Resolution</b>                                                                                                                                                                                                                                                                                                                                                                                                                                                                                                                    |
| <ul style="list-style-type: none"> <li>Identifying missing medication, inadequate duration, duplicate therapies on discharge prescription</li> </ul>                                                                                                                                                                                                                                         | <ul style="list-style-type: none"> <li>Ensuring that prescription for DAPT and other ACS medications has been correctly provided for at least 30 days (patient’s discharging and/or outpatient cardiologist may be contacted)</li> </ul>                                                                                                                                                                                                                                                                                                         |
| <b>3. Identification and resolution of AEs and/or patient-related concerns (at first telephone call and then as needed)</b>                                                                                                                                                                                                                                                                  |                                                                                                                                                                                                                                                                                                                                                                                                                                                                                                                                                  |
| <b>Activity</b>                                                                                                                                                                                                                                                                                                                                                                              | <b>Options for Resolution</b>                                                                                                                                                                                                                                                                                                                                                                                                                                                                                                                    |
| <ul style="list-style-type: none"> <li>Focused assessment and resolution of cardiac medication AEs and patient’s concerns about therapies</li> <li>May include assessment for light-headedness, syncope, dyspnea</li> </ul>                                                                                                                                                                  | <ul style="list-style-type: none"> <li>Modify therapy to resolve a significant AE (e.g., change ticagrelor to clopidogrel if ticagrelor-induced dyspnea leads to medication non-adherence, change angiotensin-converting enzyme inhibitor [ACEI] to an angiotension II receptor antagonist [ARB] if dry cough likely due to ACEI is hindering adherence)</li> <li>Modify therapy to address significant patient concern (e.g., change prescribed statin to a different one if patient non-adherence is due to an AE or other concern)</li> </ul> |

|                                                                                                                                                                                                                                                                                                                                                                                                                                                                                                                                                                           |                                                                                                                                                                                                                                                                                                                                                                                                                                                                                                                                                                                 |
|---------------------------------------------------------------------------------------------------------------------------------------------------------------------------------------------------------------------------------------------------------------------------------------------------------------------------------------------------------------------------------------------------------------------------------------------------------------------------------------------------------------------------------------------------------------------------|---------------------------------------------------------------------------------------------------------------------------------------------------------------------------------------------------------------------------------------------------------------------------------------------------------------------------------------------------------------------------------------------------------------------------------------------------------------------------------------------------------------------------------------------------------------------------------|
| <b>4. Identification of cardiac medication-related issues and therapy optimization (at first telephone call and then as needed)</b>                                                                                                                                                                                                                                                                                                                                                                                                                                       |                                                                                                                                                                                                                                                                                                                                                                                                                                                                                                                                                                                 |
| <b>Activity</b>                                                                                                                                                                                                                                                                                                                                                                                                                                                                                                                                                           | <b>Options for Resolution</b>                                                                                                                                                                                                                                                                                                                                                                                                                                                                                                                                                   |
| <ul style="list-style-type: none"> <li>Identifying significant drug/food interactions</li> <li>Ensuring relevant urgent therapy optimization</li> <li>Identifying use of contraindicated medications</li> </ul>                                                                                                                                                                                                                                                                                                                                                           | <ul style="list-style-type: none"> <li>Modify therapy to resolve drug interactions</li> <li>Assess and address critically high BP, BG levels</li> <li>Discontinue contraindicated medications (e.g., NSAIDs, oral decongestants)</li> </ul>                                                                                                                                                                                                                                                                                                                                     |
| <b>5. Streamlined therapy counselling based on baseline medication knowledge (second telephone call and then as needed)</b>                                                                                                                                                                                                                                                                                                                                                                                                                                               |                                                                                                                                                                                                                                                                                                                                                                                                                                                                                                                                                                                 |
| <b>Activity</b>                                                                                                                                                                                                                                                                                                                                                                                                                                                                                                                                                           | <b>Options for Resolution</b>                                                                                                                                                                                                                                                                                                                                                                                                                                                                                                                                                   |
| <ul style="list-style-type: none"> <li>Assessing baseline medication knowledge of ACS medications</li> <li>Determining areas that require counselling (indication, dosing, duration, AEs)</li> </ul>                                                                                                                                                                                                                                                                                                                                                                      | <ul style="list-style-type: none"> <li>Counselling on antiplatelet and oral anticoagulant <ul style="list-style-type: none"> <li>Indication, dosing, duration, AEs</li> <li>Importance of medication-adherence</li> <li>Notification of other health care professionals if potential need to hold therapy arises</li> </ul> </li> <li>Counselling on other ACS medications <ul style="list-style-type: none"> <li>Indication, duration of each ACS therapy</li> <li>Importance of medication-adherence, not stopping therapy unless told by cardiologist</li> </ul> </li> </ul> |
| <b>Final Assessment and Recommendations for Follow-Up</b>                                                                                                                                                                                                                                                                                                                                                                                                                                                                                                                 |                                                                                                                                                                                                                                                                                                                                                                                                                                                                                                                                                                                 |
| <ol style="list-style-type: none"> <li>1. Identification and resolution of any remaining cardiac medication-related issues</li> <li>2. Identification of any cardiac medication-related issues that require follow-up</li> <li>3. Preparation of program discharge summary outlining patient's history, current list of medications, care provided during the program, and issues that require follow-up, sent at the end of the program to: <ol style="list-style-type: none"> <li>a. PCP</li> <li>b. Community pharmacy</li> <li>c. Cardiologist</li> </ol> </li> </ol> |                                                                                                                                                                                                                                                                                                                                                                                                                                                                                                                                                                                 |

**Program Communication:**

- Documentation of each telephone conversation in Connect Care computer charting system
- Discharge summary routed to cardiologist and faxed to patient's PCP and community pharmacy. This discharge summary will include issues needing follow-up at the end of the program .
- Other documentation will be routed to cardiologist, PCP and community pharmacy based on issues identified throughout the program.

Abbreviations: ACS = acute coronary syndrome, AE = adverse effect, BG = blood glucose, BP = blood pressure, DAPT = dual antiplatelet therapy, PCP = primary care provider, NSAID = nonsteroidal anti-inflammatory drug.

## Part 2. Patient Assessment Templates

Visit 1:

| Part I: Medication-Taking               |                                                                                                                                                                                                                                                                                        |                          |                          |                                   |
|-----------------------------------------|----------------------------------------------------------------------------------------------------------------------------------------------------------------------------------------------------------------------------------------------------------------------------------------|--------------------------|--------------------------|-----------------------------------|
| <b>Access to Community Pharmacy</b>     | <input type="checkbox"/> Preferred community pharmacy updated<br><input type="checkbox"/> Prescription has been taken to this pharmacy<br><input type="checkbox"/> Nearby pharmacy needs to fill prescription<br>Notes:                                                                |                          |                          |                                   |
| <b>Discharge Prescription Pick-Up</b>   | <input type="checkbox"/> Picked up prescription from the pharmacy<br>Date:_____. Time to first new Rx pick-up:_____<br><input type="checkbox"/> Require family member to pick up prescription<br><input type="checkbox"/> Require community pharmacy to deliver prescription<br>Notes: |                          |                          |                                   |
| <b>Medication Availability</b>          | <input type="checkbox"/> Medication not filled due to lack of stock in the community pharmacy<br><input type="checkbox"/> Another pharmacy available to provide this medication<br>Notes:                                                                                              |                          |                          |                                   |
| <b>Financial Barriers</b>               | Insurance:<br><input type="checkbox"/> Seniors Blue Cross<br><input type="checkbox"/> Non-group Blue Cross<br><input type="checkbox"/> NIHB<br><input type="checkbox"/> Third party:<br><input type="checkbox"/> No drug coverage                                                      |                          |                          |                                   |
|                                         | In the past 12 months, because of cost, did you decide not to fill a prescription, not to refill a prescription, or do anything to make a prescription last longer?<br><input type="checkbox"/> Yes <input type="checkbox"/> No<br>Other financial concerns / barriers:<br>Notes:      |                          |                          |                                   |
|                                         | Special authorization application required?<br><input type="checkbox"/> Cardiac medication that requires application for special authorization<br><input type="checkbox"/> Medications need to be switched to lowest-cost alternative<br>Notes:                                        |                          |                          |                                   |
| <b>Medication Experience</b>            | <input type="checkbox"/> New:<br><input type="checkbox"/> Chronic:                                                                                                                                                                                                                     |                          |                          |                                   |
| <b>Regimen Complexity</b>               |                                                                                                                                                                                                                                                                                        |                          |                          |                                   |
| <b>Functional Medication Management</b> |                                                                                                                                                                                                                                                                                        |                          |                          |                                   |
|                                         |                                                                                                                                                                                                                                                                                        | <b>Self</b>              | <b>Caregiver</b>         | <b>Other</b>                      |
|                                         | <b>Ordering</b>                                                                                                                                                                                                                                                                        | <input type="checkbox"/> | <input type="checkbox"/> | <input type="checkbox"/>          |
|                                         | <b>Pick-up</b>                                                                                                                                                                                                                                                                         | <input type="checkbox"/> | <input type="checkbox"/> | <input type="checkbox"/>          |
|                                         | <b>Administer</b>                                                                                                                                                                                                                                                                      | <input type="checkbox"/> | <input type="checkbox"/> | <input type="checkbox"/> Homecare |
|                                         | <b>Organize</b>                                                                                                                                                                                                                                                                        | <input type="checkbox"/> | <input type="checkbox"/> | <input type="checkbox"/>          |

|                                         |                                                                                                                                                                                                                                     |           |                                 |                                                   |
|-----------------------------------------|-------------------------------------------------------------------------------------------------------------------------------------------------------------------------------------------------------------------------------------|-----------|---------------------------------|---------------------------------------------------|
|                                         | Method:<br><input type="checkbox"/> Vial supply<br><input type="checkbox"/> Dosette - self<br><input type="checkbox"/> Dosette - caregiver<br><input type="checkbox"/> Blister pack -pharmacy<br><input type="checkbox"/> Other:    |           |                                 |                                                   |
|                                         | <b>Reminders</b><br><input type="checkbox"/> Scheduled / combined with daily tasks<br><input type="checkbox"/> Caregiver<br><input type="checkbox"/> Alarm<br><input type="checkbox"/> Phone app<br><input type="checkbox"/> Other: |           |                                 |                                                   |
|                                         |                                                                                                                                                                                                                                     | <b>No</b> | <b>Yes:<br/>Use of<br/>aid?</b> | <b>Impact on medication-taking /<br/>comments</b> |
|                                         | Cognitive                                                                                                                                                                                                                           |           |                                 |                                                   |
|                                         | Visual                                                                                                                                                                                                                              |           |                                 |                                                   |
|                                         | Hearing                                                                                                                                                                                                                             |           |                                 |                                                   |
|                                         | Mobility                                                                                                                                                                                                                            |           |                                 |                                                   |
|                                         | Swallowing                                                                                                                                                                                                                          |           |                                 |                                                   |
|                                         | Dexterity                                                                                                                                                                                                                           |           |                                 |                                                   |
| <b>Notes:</b>                           |                                                                                                                                                                                                                                     |           |                                 |                                                   |
| <b>ACS<br/>Medication<br/>Knowledge</b> |                                                                                                                                                                                                                                     |           |                                 |                                                   |
|                                         | <b>Question</b>                                                                                                                                                                                                                     |           |                                 |                                                   |
|                                         | 1. Can you list the names of all medications you are currently taking? <input type="checkbox"/> No aids <input type="checkbox"/> Uses aids: (medication list, bottles)                                                              |           |                                 |                                                   |
|                                         | 2. Can you tell me why you are taking **?                                                                                                                                                                                           |           |                                 |                                                   |
|                                         | 3. Do you know how to take your **?                                                                                                                                                                                                 |           |                                 |                                                   |
|                                         | 4. Do you know when to take your medicine?                                                                                                                                                                                          |           |                                 |                                                   |
|                                         | 5. Do you know the possible side effects of your medicine?                                                                                                                                                                          |           |                                 |                                                   |
|                                         | 6. Do you know what to do if a side effect occurs?                                                                                                                                                                                  |           |                                 |                                                   |
|                                         | 7. Do you know what to do if you miss a dose?                                                                                                                                                                                       |           |                                 |                                                   |
|                                         | <b>Total score</b>                                                                                                                                                                                                                  |           |                                 |                                                   |
|                                         | High medication knowledge is considered a score $\geq$ 5.                                                                                                                                                                           |           |                                 |                                                   |
|                                         | Notes:                                                                                                                                                                                                                              |           |                                 |                                                   |
| <b>Medication<br/>Adherence</b>         | Method:<br>Adherence:                                                                                                                                                                                                               |           |                                 |                                                   |
|                                         | Which of the following categories best describes your use of prescribed heart medications?<br><input type="checkbox"/> Take all of your pills                                                                                       |           |                                 |                                                   |

|                                             |                                                                                                                                                                                                                                                                                                                                                                                                                                                                                                                                                                                                                                                                                                                                                                                                                                                                                                                                                                                                                                                                                                                                                              |                                    |                                    |                                             |                                             |                                          |                                      |                                       |  |
|---------------------------------------------|--------------------------------------------------------------------------------------------------------------------------------------------------------------------------------------------------------------------------------------------------------------------------------------------------------------------------------------------------------------------------------------------------------------------------------------------------------------------------------------------------------------------------------------------------------------------------------------------------------------------------------------------------------------------------------------------------------------------------------------------------------------------------------------------------------------------------------------------------------------------------------------------------------------------------------------------------------------------------------------------------------------------------------------------------------------------------------------------------------------------------------------------------------------|------------------------------------|------------------------------------|---------------------------------------------|---------------------------------------------|------------------------------------------|--------------------------------------|---------------------------------------|--|
|                                             | <input type="checkbox"/> Take 75%–99% of your pills<br><input type="checkbox"/> Take 50%–74% of your pills<br><input type="checkbox"/> Take less than 50% of your pills<br><input type="checkbox"/> Take none of your pills<br><input type="checkbox"/> Not applicable<br><br>Some people have difficulty taking their medications. Have you <b>missed</b> taking any of your medications in the past 2 weeks?<br><input type="checkbox"/> No<br><input type="checkbox"/> Yes<br>What is the most likely reason for patient to miss a medication?<br><table border="1" style="width: 100%;"> <tr> <td><input type="checkbox"/> Forgetful</td> <td><input type="checkbox"/> Financial</td> </tr> <tr> <td><input type="checkbox"/> Busy schedule/work</td> <td><input type="checkbox"/> Medication working</td> </tr> <tr> <td><input type="checkbox"/> Non-routine day</td> <td><input type="checkbox"/> Side effect</td> </tr> <tr> <td colspan="2"><input type="checkbox"/> Other: _____</td> </tr> </table><br>When you feel better, do you ever stop taking or cut back on your medications?<br><input type="checkbox"/> No <input type="checkbox"/> Yes | <input type="checkbox"/> Forgetful | <input type="checkbox"/> Financial | <input type="checkbox"/> Busy schedule/work | <input type="checkbox"/> Medication working | <input type="checkbox"/> Non-routine day | <input type="checkbox"/> Side effect | <input type="checkbox"/> Other: _____ |  |
| <input type="checkbox"/> Forgetful          | <input type="checkbox"/> Financial                                                                                                                                                                                                                                                                                                                                                                                                                                                                                                                                                                                                                                                                                                                                                                                                                                                                                                                                                                                                                                                                                                                           |                                    |                                    |                                             |                                             |                                          |                                      |                                       |  |
| <input type="checkbox"/> Busy schedule/work | <input type="checkbox"/> Medication working                                                                                                                                                                                                                                                                                                                                                                                                                                                                                                                                                                                                                                                                                                                                                                                                                                                                                                                                                                                                                                                                                                                  |                                    |                                    |                                             |                                             |                                          |                                      |                                       |  |
| <input type="checkbox"/> Non-routine day    | <input type="checkbox"/> Side effect                                                                                                                                                                                                                                                                                                                                                                                                                                                                                                                                                                                                                                                                                                                                                                                                                                                                                                                                                                                                                                                                                                                         |                                    |                                    |                                             |                                             |                                          |                                      |                                       |  |
| <input type="checkbox"/> Other: _____       |                                                                                                                                                                                                                                                                                                                                                                                                                                                                                                                                                                                                                                                                                                                                                                                                                                                                                                                                                                                                                                                                                                                                                              |                                    |                                    |                                             |                                             |                                          |                                      |                                       |  |
| <b>Other</b>                                |                                                                                                                                                                                                                                                                                                                                                                                                                                                                                                                                                                                                                                                                                                                                                                                                                                                                                                                                                                                                                                                                                                                                                              |                                    |                                    |                                             |                                             |                                          |                                      |                                       |  |
|                                             | <input type="checkbox"/> Social supports -<br><input type="checkbox"/> EtOH, cannabis, nicotine -                                                                                                                                                                                                                                                                                                                                                                                                                                                                                                                                                                                                                                                                                                                                                                                                                                                                                                                                                                                                                                                            |                                    |                                    |                                             |                                             |                                          |                                      |                                       |  |
| <b>Part II: Therapeutic Review</b>          |                                                                                                                                                                                                                                                                                                                                                                                                                                                                                                                                                                                                                                                                                                                                                                                                                                                                                                                                                                                                                                                                                                                                                              |                                    |                                    |                                             |                                             |                                          |                                      |                                       |  |
| <b>Allergies</b>                            | <input type="checkbox"/> Updated                                                                                                                                                                                                                                                                                                                                                                                                                                                                                                                                                                                                                                                                                                                                                                                                                                                                                                                                                                                                                                                                                                                             |                                    |                                    |                                             |                                             |                                          |                                      |                                       |  |
| <b>BPMH</b>                                 | <input type="checkbox"/> Updated                                                                                                                                                                                                                                                                                                                                                                                                                                                                                                                                                                                                                                                                                                                                                                                                                                                                                                                                                                                                                                                                                                                             |                                    |                                    |                                             |                                             |                                          |                                      |                                       |  |
| <b>Medication Discrepancy</b>               | <input type="checkbox"/> Patient-level contribution (e.g., performance deficit): _____<br><input type="checkbox"/> System-level contribution (e.g., prescription missing medication): _____                                                                                                                                                                                                                                                                                                                                                                                                                                                                                                                                                                                                                                                                                                                                                                                                                                                                                                                                                                  |                                    |                                    |                                             |                                             |                                          |                                      |                                       |  |
| <b>Cardiac-Medication Considerations</b>    | <input type="checkbox"/> Contraindicated medication (e.g., NSAID, oral decongestant, herbals, supplements): _____<br><input type="checkbox"/> Notable drug/food interaction: _____<br><input type="checkbox"/> New AE reported by patient (e.g., dyspnea to ticagrelor, diarrhea to colchicine, cough to ACEI, light-headedness, syncope): _____<br><input type="checkbox"/> Medication-specific patient concerns: _____                                                                                                                                                                                                                                                                                                                                                                                                                                                                                                                                                                                                                                                                                                                                     |                                    |                                    |                                             |                                             |                                          |                                      |                                       |  |
| <b>Visit to ED/or Care Provider</b>         | <input type="checkbox"/> Patient visited ED                                                                                                                                                                                                                                                                                                                                                                                                                                                                                                                                                                                                                                                                                                                                                                                                                                                                                                                                                                                                                                                                                                                  |                                    |                                    |                                             |                                             |                                          |                                      |                                       |  |

|                                                                            | <input type="checkbox"/> Patient hospitalized<br><input type="checkbox"/> Patient visited care provider (e.g., PCP, walk-in clinic)<br>Date: _____ Planned or unplanned: _____                                                                                                                                                                                                                                                                                                                                                                                                                                                                                 |      |     |        |   |        |                |  |  |  |  |                 |  |  |  |  |
|----------------------------------------------------------------------------|----------------------------------------------------------------------------------------------------------------------------------------------------------------------------------------------------------------------------------------------------------------------------------------------------------------------------------------------------------------------------------------------------------------------------------------------------------------------------------------------------------------------------------------------------------------------------------------------------------------------------------------------------------------|------|-----|--------|---|--------|----------------|--|--|--|--|-----------------|--|--|--|--|
| <b>Pharmacokinetic / Dynamics</b>                                          | <b>Renal Function:</b><br><table border="1" data-bbox="492 441 1433 556"> <thead> <tr> <th></th> <th>Scr</th> <th>eGFR</th> <th>K</th> <th>Notes:</th> </tr> </thead> <tbody> <tr> <td>Current (date)</td> <td></td> <td></td> <td></td> <td></td> </tr> <tr> <td>Baseline (date)</td> <td></td> <td></td> <td></td> <td></td> </tr> </tbody> </table> <input type="checkbox"/> CKD<br><input type="checkbox"/> Updated labs required<br><br><b>Hepatic Function:*</b>                                                                                                                                                                                         |      | Scr | eGFR   | K | Notes: | Current (date) |  |  |  |  | Baseline (date) |  |  |  |  |
|                                                                            | Scr                                                                                                                                                                                                                                                                                                                                                                                                                                                                                                                                                                                                                                                            | eGFR | K   | Notes: |   |        |                |  |  |  |  |                 |  |  |  |  |
| Current (date)                                                             |                                                                                                                                                                                                                                                                                                                                                                                                                                                                                                                                                                                                                                                                |      |     |        |   |        |                |  |  |  |  |                 |  |  |  |  |
| Baseline (date)                                                            |                                                                                                                                                                                                                                                                                                                                                                                                                                                                                                                                                                                                                                                                |      |     |        |   |        |                |  |  |  |  |                 |  |  |  |  |
| <b>Risk Factor and Comorbidity Considerations</b>                          | <b>Risk Factors:</b><br><input type="checkbox"/> HTN (BP=)<br><input type="checkbox"/> Dyslipidemia (LDL= )      Next lipid panel due:<br><input type="checkbox"/> Diabetes (A1C _%)<br><input type="checkbox"/> Positive family history<br><input type="checkbox"/> Smoking<br><input type="checkbox"/> EtOH<br><input type="checkbox"/> Other: _____<br><br><b>Comorbidities:</b><br><input type="checkbox"/> HF      LVEF: _____<br><input type="checkbox"/> AFIB (CHADS2 = __); Anticoagulation regimen: Rate / rhythm control:<br><input type="checkbox"/> VT<br><input type="checkbox"/> Anemia      Hgb: _____<br><input type="checkbox"/> Other: _____ |      |     |        |   |        |                |  |  |  |  |                 |  |  |  |  |
| <b>Current ACS Regimen</b><br><br>Hosp:<br>PCI:<br>LV clot:<br>EF:<br>BNP: | <input type="checkbox"/> ASA<br><input type="checkbox"/> P2Y12 inhibitor<br><input type="checkbox"/> Warfarin<br><input type="checkbox"/> DOAC<br><input type="checkbox"/> Statin      Optimum dose?:<br><input type="checkbox"/> Ezetimibe<br><input type="checkbox"/> Beta-blocker<br><input type="checkbox"/> ACEI/ARB<br><input type="checkbox"/> MRA<br><input type="checkbox"/> Other:<br><br>                                                                                                                                                                                                                                                           |      |     |        |   |        |                |  |  |  |  |                 |  |  |  |  |



|                          |                                                                                |
|--------------------------|--------------------------------------------------------------------------------|
| <b>Patient Follow-Up</b> | <input type="checkbox"/> Patient has follow-up with PCP in 1–2 weeks<br>Notes: |
|--------------------------|--------------------------------------------------------------------------------|

Visits 2 and 3:

| <b>Assessment and Follow-up</b>          |                                                                                                                                                                                                                                                                                                                                                                                                                                 |
|------------------------------------------|---------------------------------------------------------------------------------------------------------------------------------------------------------------------------------------------------------------------------------------------------------------------------------------------------------------------------------------------------------------------------------------------------------------------------------|
| <b>Visit to ED/or Care Provider</b>      | <input type="checkbox"/> Patient visited ED<br><input type="checkbox"/> Patient hospitalized<br><input type="checkbox"/> Patient visited care-provider (e.g., PCP, walk-in clinic)<br>Date: _____ Planned or unplanned: _____<br>_____                                                                                                                                                                                          |
| <b>Change in Medications</b>             | <input type="checkbox"/> Any new medication or change in regimen since last visit (e.g., prescribed, OTC, herbals):<br>Date: _____ Prescriber/Initiator: _____                                                                                                                                                                                                                                                                  |
| <b>Cardiac-Medication Considerations</b> | <input type="checkbox"/> Contraindicated medication (e.g., NSAID, oral decongestant, herbals, supplements): _____<br><input type="checkbox"/> Notable drug/food interaction: _____<br><input type="checkbox"/> New AE reported by patient (e.g., dyspnea to ticagrelor, diarrhea to colchicine, cough to ACEI, light-headedness, syncope):<br>_____<br><input type="checkbox"/> New medication-specific patient concerns: _____ |
| <b>Medication-Taking</b>                 | <input type="checkbox"/> Missed any doses or delayed taking any doses: _____                                                                                                                                                                                                                                                                                                                                                    |
| <b>Therapy Optimization Assessment</b>   | <input type="checkbox"/> Home BP readings: _____<br><input type="checkbox"/> Home BG readings: _____<br><input type="checkbox"/> Home weight: _____                                                                                                                                                                                                                                                                             |

Abbreviations: ACEI = angiotensin-converting enzyme inhibitor, ACS = acute coronary syndrome, AE = adverse effect, AFIB = atrial fibrillation, ARB = angiotensin II receptor blocker, ASA = acetylsalicylic acid, BNP = B-type natriuretic peptide, BPMH = best possible medication history, CKD = chronic kidney disease, DOAC = direct oral anticoagulant, ED = emergency department, EF = ejection fraction, eGFR = estimated glomerular filtration rate, EtOH = alcohol, HF = heart failure, HTN = hypertension, K = potassium, LDL = low-density lipoprotein, LV = left ventricle, LVEF = left ventricular ejection fraction, MRA = mineralocorticoid receptor antagonist, NIHB = Non-Insured Health Benefit, OTC = over-the-counter medications, PCI = percutaneous coronary intervention, PCP = primary care provider, Rx = prescription, SCr = serum creatinine, VT = venous thrombosis.

### Part 3. Discharge Summary Template

### PLURAL-ACS Pilot Program

Date:

Primary Care Provider:  
Cardiologist:  
Community Pharmacy:

**Re:** PLURAL-ACS Pilot Program Discharge Summary

**DOB:**

**ULI:**

Please be advised that your patient, \_\_\_\_\_, was referred to the PLURAL-ACS Pilot Program, where \_\_\_\_\_ received pharmacist-led follow-up care after being discharged from the Mazankowski Alberta Heart Institute on \_\_\_\_\_ following a \_\_\_\_\_.

Follow-up took place over the course of one month via scheduled telephone visits. A detailed review and assessment of \_\_\_\_\_'s medications was undertaken. A summary is provided below (please refer to hospital discharge summary for details regarding hospital stay).

#### **Pertinent Cardiac History:**

#### **Cardiac Drug Therapy:**

#### **Clinical Issues Addressed During the Program:**

#### **Clinical Issues that Require Follow-Up:**

I have identified the following concerns/issues as part of my review that require follow-up:

1. Medication-Taking:

2. Cardiovascular Risk Factors:

| Risk Factor:                             |                                                                                                                            | Comments:                  |
|------------------------------------------|----------------------------------------------------------------------------------------------------------------------------|----------------------------|
| <input type="checkbox"/><br>Hypertension | <input type="checkbox"/> treated<br><input type="checkbox"/> controlled<br><input type="checkbox"/> requires<br>assessment | Home Blood Pressure:_____. |

|                                     |                                                                                                                         |                                                                                                                                                                    |
|-------------------------------------|-------------------------------------------------------------------------------------------------------------------------|--------------------------------------------------------------------------------------------------------------------------------------------------------------------|
| <input type="checkbox"/> Lipids     | <input type="checkbox"/> treated<br><input type="checkbox"/> controlled<br><input type="checkbox"/> requires assessment | Requires a lipid panel in 2-4 weeks. If LDL-C remains above 1.8 mmol/L (or non-HDL above 2.4 mmol/L), patient would require further optimization of lipid therapy. |
| <input type="checkbox"/> Diabetes   | <input type="checkbox"/> treated<br><input type="checkbox"/> controlled<br><input type="checkbox"/> requires assessment | A1C: _____. Home blood glucose: _____.                                                                                                                             |
| <input type="checkbox"/> Smoking    | <input type="checkbox"/> treated<br><input type="checkbox"/> controlled<br><input type="checkbox"/> requires assessment |                                                                                                                                                                    |
| <input type="checkbox"/> Overweight | <input type="checkbox"/> treated<br><input type="checkbox"/> controlled<br><input type="checkbox"/> requires assessment | BMI: _____. Education provided on role of lifestyle modifications and to initiate them under the recommendations of the cardiac rehab program.                     |

3. Other:

Thank you for the opportunity to participate in the care of this patient.

Sincerely,  
XXXXX  
XXXXX  
XXXXX

## Part 4. List of Cardiac Medications

### Category of Medication

- Acetylsalicylic acid
- P2Y12 inhibitors
- Oral anticoagulants
- Statins
- Ezetimibe
- Beta-blockers
- Angiotensin-converting enzyme inhibitors or angiotensin II receptor blockers
- Mineralocorticoid receptor antagonists
- Nitroglycerin SL spray or topical patch
- Dihydropyridine calcium channel blockers
- Diabetic medications with cardiovascular benefit: metformin, SGLT-2 inhibitors, GLP-agonists

Abbreviations: GLP = glucagon-like peptide, SGLT-2 = sodium-glucose transport protein 2, SL = sublingual.

## Part 5. Definitions of Cardiac Medication-Related Issues

### General Cardiac Medication Issues

- Adverse effects: any side effect that is assessed to be secondary to newly initiated or titrated cardiac medication (e.g., new nose bleeds after initiation of dual antiplatelet therapy)
- Patient medication concern: apprehension or question regarding a cardiac medication brought forward by the patient that required pharmacist intervention (e.g., patient asks which medication for gout is safe to take in light of patient's cardiac condition)
- Contraindicated medication: any medication that is contraindicated with patient's cardiac condition (e.g., pseudoephedrine post-acute coronary syndrome)
- Therapy optimization required: when objective measurements of medication effect fail to meet guideline-directed targets after program pharmacist has confirmed patient adherence to therapy and after at least 5 drug half-lives have passed (e.g., average home blood pressure consistently above 135/85 mm Hg for patient with hypertension; fasting blood glucose consistently above 7 mmol/L for patient with diabetes mellitus; patient having cravings and relapsing with current smoking cessation regimen).
- Assistance with medication adherence: patient is assessed to be at high risk of medication non-adherence based on current medication administration and/or patient expresses need for assistance with adherence (e.g., establishment of blister packs after patient demonstrates confusion regarding administration and timing of current medications)
- Drug/food interaction: any drug or food item that is categorized to be at least a level C interaction based on Lexicomp database with prescribed cardiac medications and that has not previously been addressed (e.g., phosphodiesterase-5 inhibitor and nitroglycerin patch, omega-3 supplementation and antiplatelet therapy)
- Follow-up on ordered blood work required: outpatient blood work to assess the effects of a recently added medication (e.g., serum creatinine after addition of an angiotensin-converting enzyme inhibitor, serum potassium after addition of spironolactone) that was ordered by the discharging cardiology team is not followed up on, leaving the patient at risk of potential harm

### Patient-Level Medication Issues

Note: The term “medication adherence” is the extent to which medication intake behaviour corresponds with the recommendations of the health care provider.<sup>1</sup> Therefore, “non-adherence” in our study was defined as any situation since the last scheduled visit where medication was not taken as indicated in the discharge prescription (includes withholding of medication entirely, taking the incorrect dose, or changing the frequency of the medication-taking). This includes any time that less than 100% of the pills were taken since the last scheduled visit.

- Non-intentional medication non-adherence: non-deliberately taking the prescribed cardiac medication differently than as prescribed (reasons may

include forgetfulness, confusion regarding therapy administration, performance deficit)

- Continued preadmission medication: patient continuing to take previously discontinued home cardiac medications or regimen that was changed at discharge, as confirmed with discharge prescription (e.g., patient continues to take amlodipine despite this drug being discontinued during hospitalization and at discharge)
- Intentional medication non-adherence: deliberately taking the prescribed cardiac medication differently than as prescribed (reasons may include patient's concern regarding cost of therapy or apprehension regarding therapy effects)
- Medication not picked up: patient fails to pick up new cardiac medication from the pharmacy after discharge, despite not having any at home
- Discontinued medication: patient deliberately and permanently discontinues cardiac medication (e.g., permanently discontinues taking atorvastatin therapy due to concern about adverse effects and refuses to restart atorvastatin therapy)

### System-Level Medication Issues

- Insufficient prescription duration: medication inadvertently prescribed for less than the intended duration on the discharge prescription, as confirmed with the discharge summary and directly with the discharging team (e.g., clopidogrel prescribed for 1 month despite decision of discharging team to prescribe for the intended 12 months following ACS)
- Drug cost a barrier: patient unable to pick up cardiac medication(s) as he/she is unable to afford them
- Non-indicated therapy: medication that is not indicated (for patient's cardiac condition or any other reason) is inadvertently included in the discharge prescription, as confirmed with the discharge summary and directly with the discharging team (e.g., pantoprazole included in discharge prescription after it is confirmed that patient's chest pain from ACS was incorrectly assessed to be acid reflux before admission)
- Insufficient pass-medication supply: supply of new medications provided to patient at discharge (to ensure continuity of therapy until patient can fill prescription in community pharmacy) does not last until patient can reach his/her community pharmacy
- Omitted medication: cardiac medication that patient received during hospital stay and that is prescribed to continue is inadvertently omitted from the discharge prescription, as confirmed with the discharge summary and directly with the discharging team
- Conflicting information: information regarding cardiac medication regimen is inconsistent between discharge prescription and discharge summary (e.g., discharge prescription includes rivaroxaban and clopidogrel for a patient's antithrombotic therapy, while discharge summary includes acetylsalicylic acid and clopidogrel)
- Unavailable medication at pharmacy: newly prescribed discharge cardiac medication is not available at patient's community pharmacy, which prevents the patient from not picking up the medication

- Failure to reconcile home medication: medication that patient was taking at home before hospital admission was not reconciled in the discharge prescription, leading to patient being unsure as to whether or not he/she should take it

Abbreviation: ACS = acute coronary syndrome.

### Reference

1. Hugtenburg JG, Timmers L, Elders PJM, Vervloet M, van Dijk L. Definitions, variants, and causes of nonadherence with medication: a challenge for tailored interventions. *Patient Prefer Adherence*. 2013;10;7:675-82.

## Part 6. Number and Percentage of Cardiac Medication–Related Issues

|                                                         | Day 1 Visit<br>No. (%) of<br>Issues<br>(n=155) | Day 10<br>Visit<br>No. (%) of<br>Issues<br>(n=60) | Day 30<br>Visit<br>No. (%) of<br>Issues<br>(n=33) | Additional<br>Visits<br>No. (%) of<br>Issues<br>(n=7) | Total<br>No. (%) of<br>Issues<br>(n=255) |
|---------------------------------------------------------|------------------------------------------------|---------------------------------------------------|---------------------------------------------------|-------------------------------------------------------|------------------------------------------|
| <b>General Cardiac Medication Issues</b>                |                                                |                                                   |                                                   |                                                       |                                          |
| <b>Adverse Effects</b>                                  | 17 (11)                                        | 28 (47)                                           | 7 (21)                                            | 0                                                     | 52 (20)                                  |
| <b>Therapy<br/>Optimization<br/>Required</b>            | 8 (5)                                          | 12 (20)                                           | 10 (30)                                           | 0                                                     | 30 (12)                                  |
| <b>Patient<br/>Medication-<br/>Concern</b>              | 8 (5)                                          | 7 (12)                                            | 8 (24)                                            | 4 (57)                                                | 27 (11)                                  |
| <b>Assistance with<br/>Adherence</b>                    | 16 (10)                                        | 0                                                 | 0                                                 | 0                                                     | 16 (6)                                   |
| <b>Contraindicated<br/>Medication</b>                   | 14 (9)                                         | 0                                                 | 0                                                 | 0                                                     | 14 (5)                                   |
| <b>Drug/Food<br/>Interaction</b>                        | 12 (8)                                         | 1 (2)                                             | 0                                                 | 0                                                     | 13 (5)                                   |
| <b>Follow-up on<br/>Ordered Blood<br/>Work Required</b> | 0                                              | 1 (2)                                             | 0                                                 | 0                                                     | 1 (0.39)                                 |
| <b>Patient-Level Medication Issues</b>                  |                                                |                                                   |                                                   |                                                       |                                          |
| <b>Non-intentional<br/>Non-adherence</b>                | 13 (8)                                         | 5 (8)                                             | 4 (12)                                            | 2 (29)                                                | 24 (9)                                   |
| <b>Medication Not<br/>Picked Up</b>                     | 10 (6)                                         | 0                                                 | 0                                                 | 0                                                     | 10 (4)                                   |
| <b>Continued<br/>Preadmission<br/>Medication</b>        | 7 (5)                                          | 0                                                 | 0                                                 | 0                                                     | 7 (3)                                    |
| <b>Intentional Non-<br/>adherence</b>                   | 2 (1)                                          | 2 (3)                                             | 2 (6)                                             | 0                                                     | 6 (2)                                    |
| <b>Discontinued<br/>Medication</b>                      | 1 (1)                                          | 2 (3)                                             | 2 (6)                                             | 0                                                     | 5 (2)                                    |
| <b>System-Level Medication Issue</b>                    |                                                |                                                   |                                                   |                                                       |                                          |
| <b>Insufficient<br/>Prescription<br/>Duration</b>       | 17 (11)                                        | 1 (2)                                             | 0                                                 | 0                                                     | 18 (7)                                   |
| <b>Omitted<br/>Medication<br/>from<br/>Prescription</b> | 15 (10)                                        | 0                                                 | 0                                                 | 0                                                     | 15 (6)                                   |



|                                             |       |       |   |        |          |
|---------------------------------------------|-------|-------|---|--------|----------|
| <b>Drug Cost a Barrier</b>                  | 6 (4) | 0     | 0 | 0      | 6 (2)    |
| <b>Conflicting Information</b>              | 2 (1) | 0     | 0 | 1 (14) | 3 (1)    |
| <b>Non-Indicated Therapy</b>                | 2 (1) | 0     | 0 | 0      | 2 (1)    |
| <b>Unavailable Medication at Pharmacy</b>   | 1 (1) | 1 (2) | 0 | 0      | 2 (1)    |
| <b>Insufficient Pass-Med Supply</b>         | 3 (2) | 0     | 0 | 0      | 3 (1)    |
| <b>Failure to Reconcile Home Medication</b> | 1 (1) | 0     | 0 | 0      | 1 (0.39) |
